# Supplementary material for: Metabolic profiling of a polyphenolic-rich fraction of Coccinia grandis leaves using LC-ESI-MS/MS and in vivo validation of its antimicrobial and wound healing activities
Source: Royal Society of Chemistry journal article supplement (doi:10.1039/c9fo01532a), 2019-01-01
Supplement: c9fo01532a1.pdf [file c9fo01532a1.pdf]

## Metabolic profiling of a polyphenolic-rich fraction of *Coccinia grandis* leaves using LC-ESI-MS/MS and in-vivo validation of its antimicrobial and wound healing activities

Somaia A. Al-Madhagy<sup>a,b</sup>, Nada M. Mostafaa<sup>a</sup>, Fadia S.Youssef<sup>a</sup>, Ghada E. A. Awad<sup>c</sup>,  
Omayma A. Eldahshan<sup>\*a,d</sup> and Abdel Nasser B. Singab<sup>\*a,d</sup>

<sup>a</sup> Department of Pharmacognosy, Faculty of Pharmacy, Ain Shams University, Abbassia, Cairo-11566, Egypt

<sup>b</sup> Department of Pharmacognosy, Faculty of Pharmacy, Sana'a University, Sana'a, Yemen

<sup>c</sup> Chemistry of Natural and Microbial Products Department, Pharmaceutical and Drug industries research Division, National Research Centre. Giza, Egypt

<sup>d</sup> Center for Drug Discovery Research and Development, Ain Shams University, Cairo, Egypt. E-mail: dean@pharma.asu.edu.eg

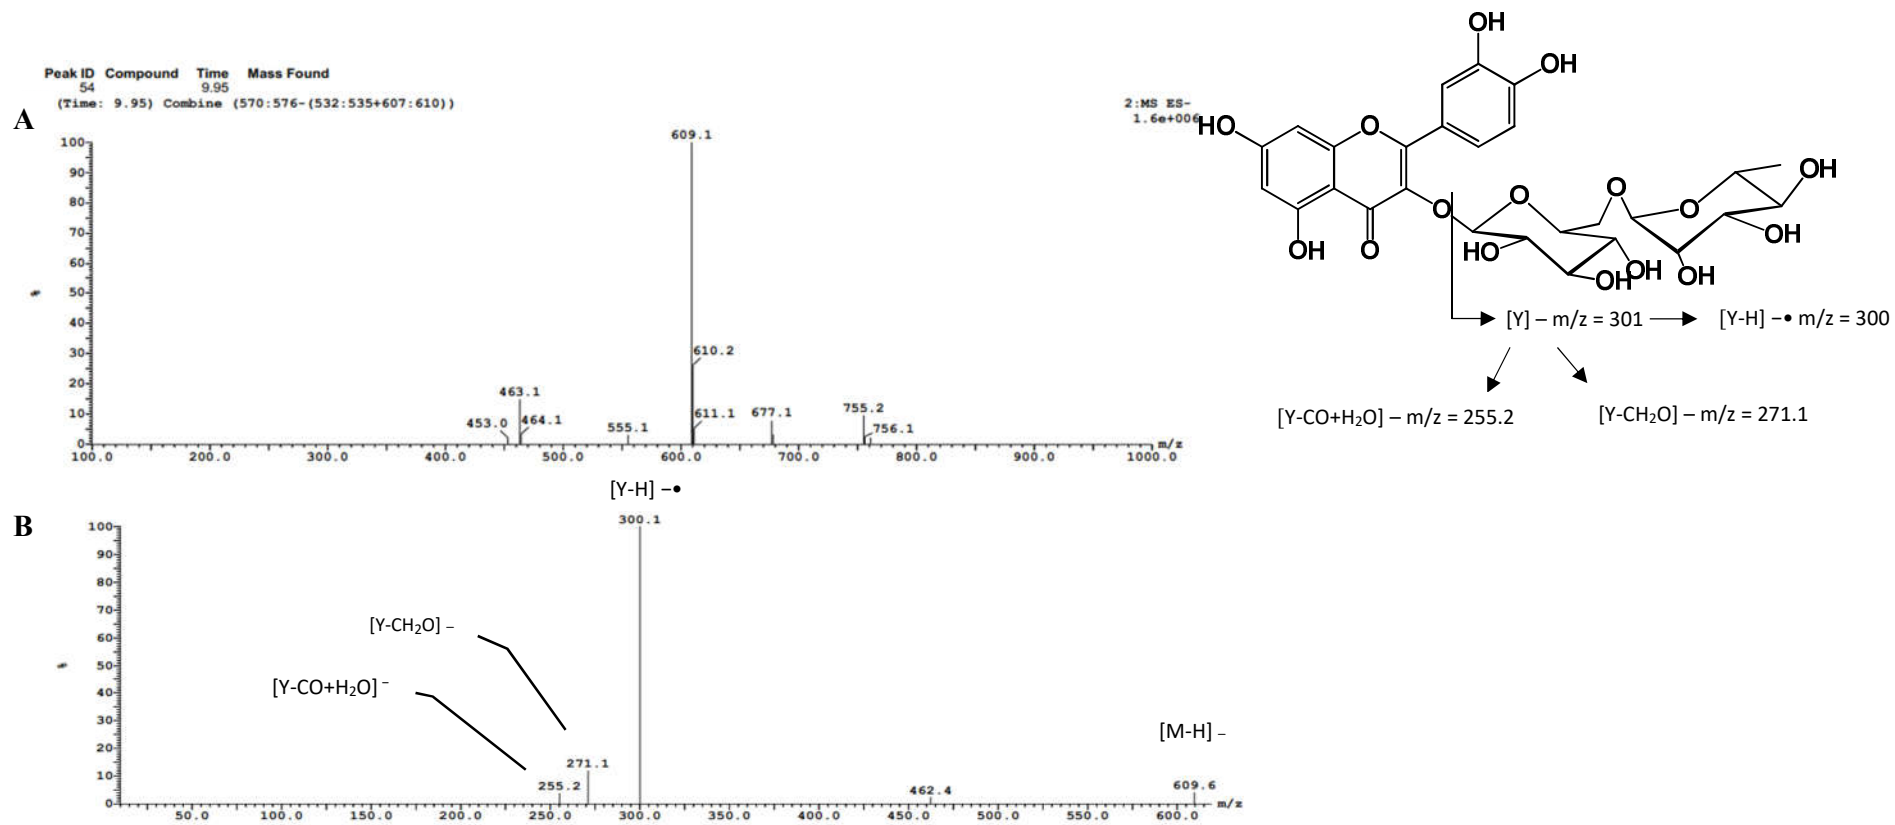

**Figure S1** Fragmentation pattern of peak (1) in total ion chromatogram of LC-ESI-MS, tentatively identified as Quercetin-hexoside deoxyhexoside (rutin) before fragmentation (A), after fragmentation (B)

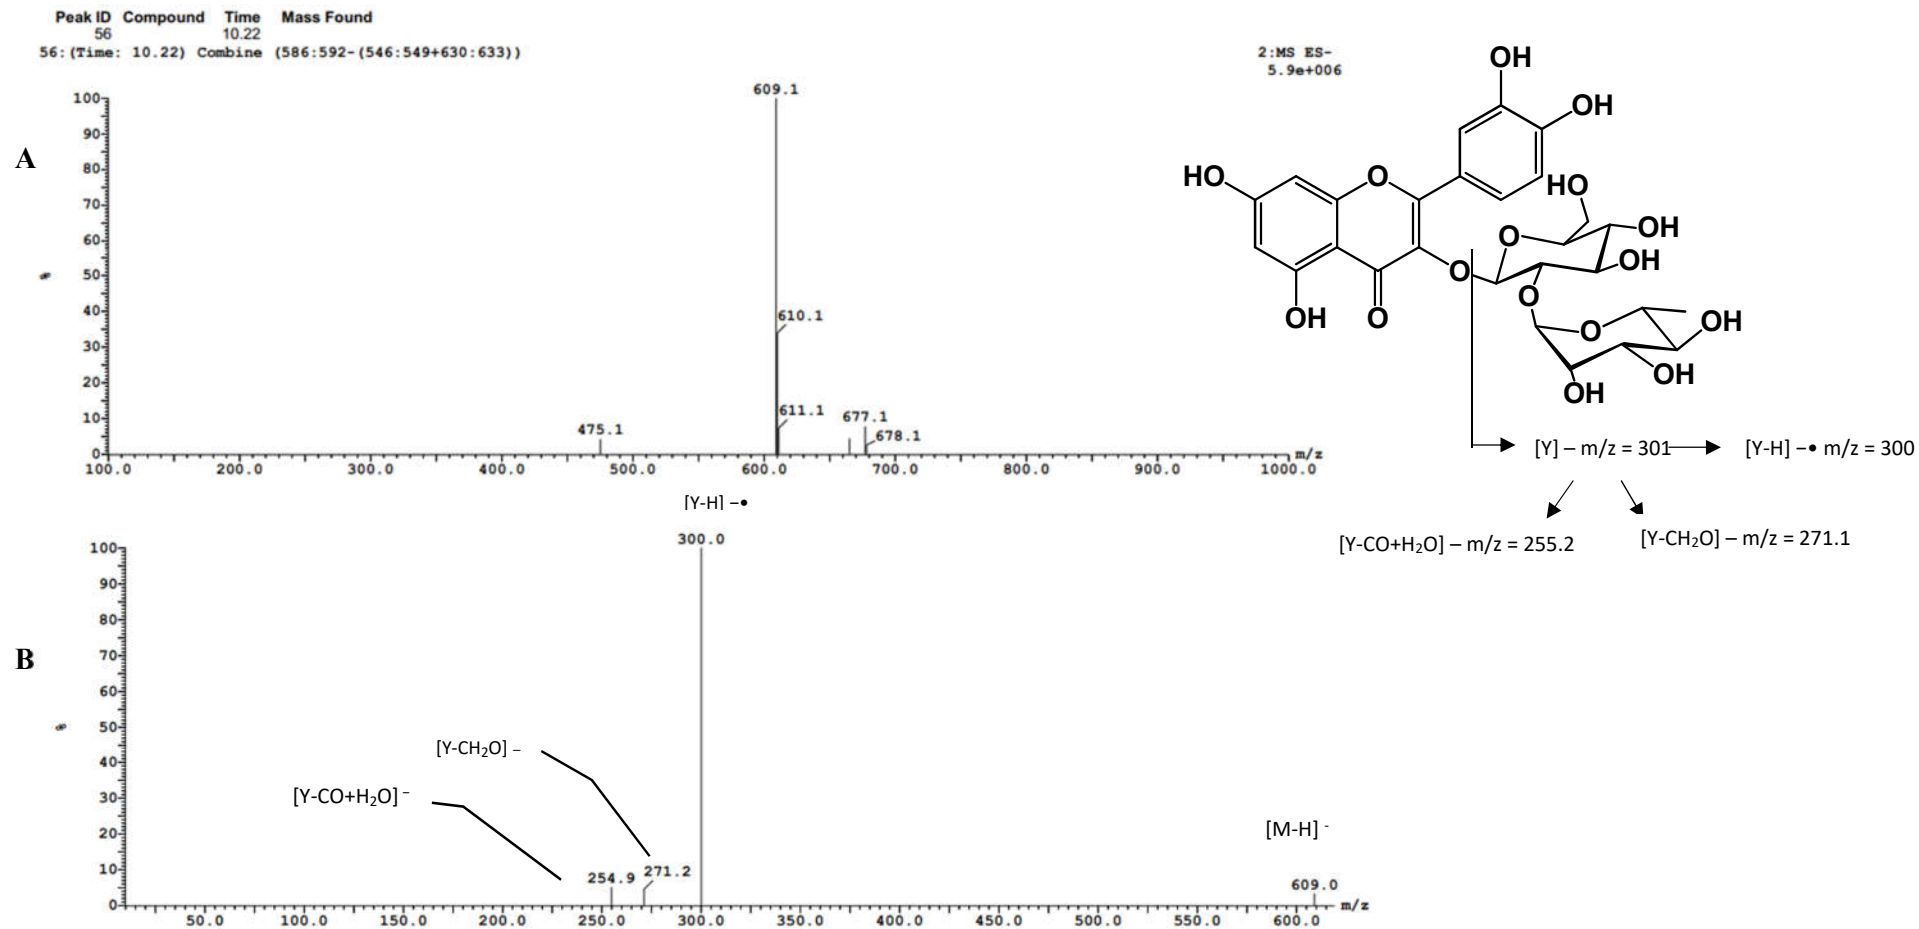

**Figure S2** Fragmentation pattern of peak (2) in total ion chromatogram of LC-ESI-MS, tentatively identified Quercetin-hexoside deoxyhexoside (quercetin -3-*O*-neohesperidoside) before fragmentation (A), after fragmentation (B).

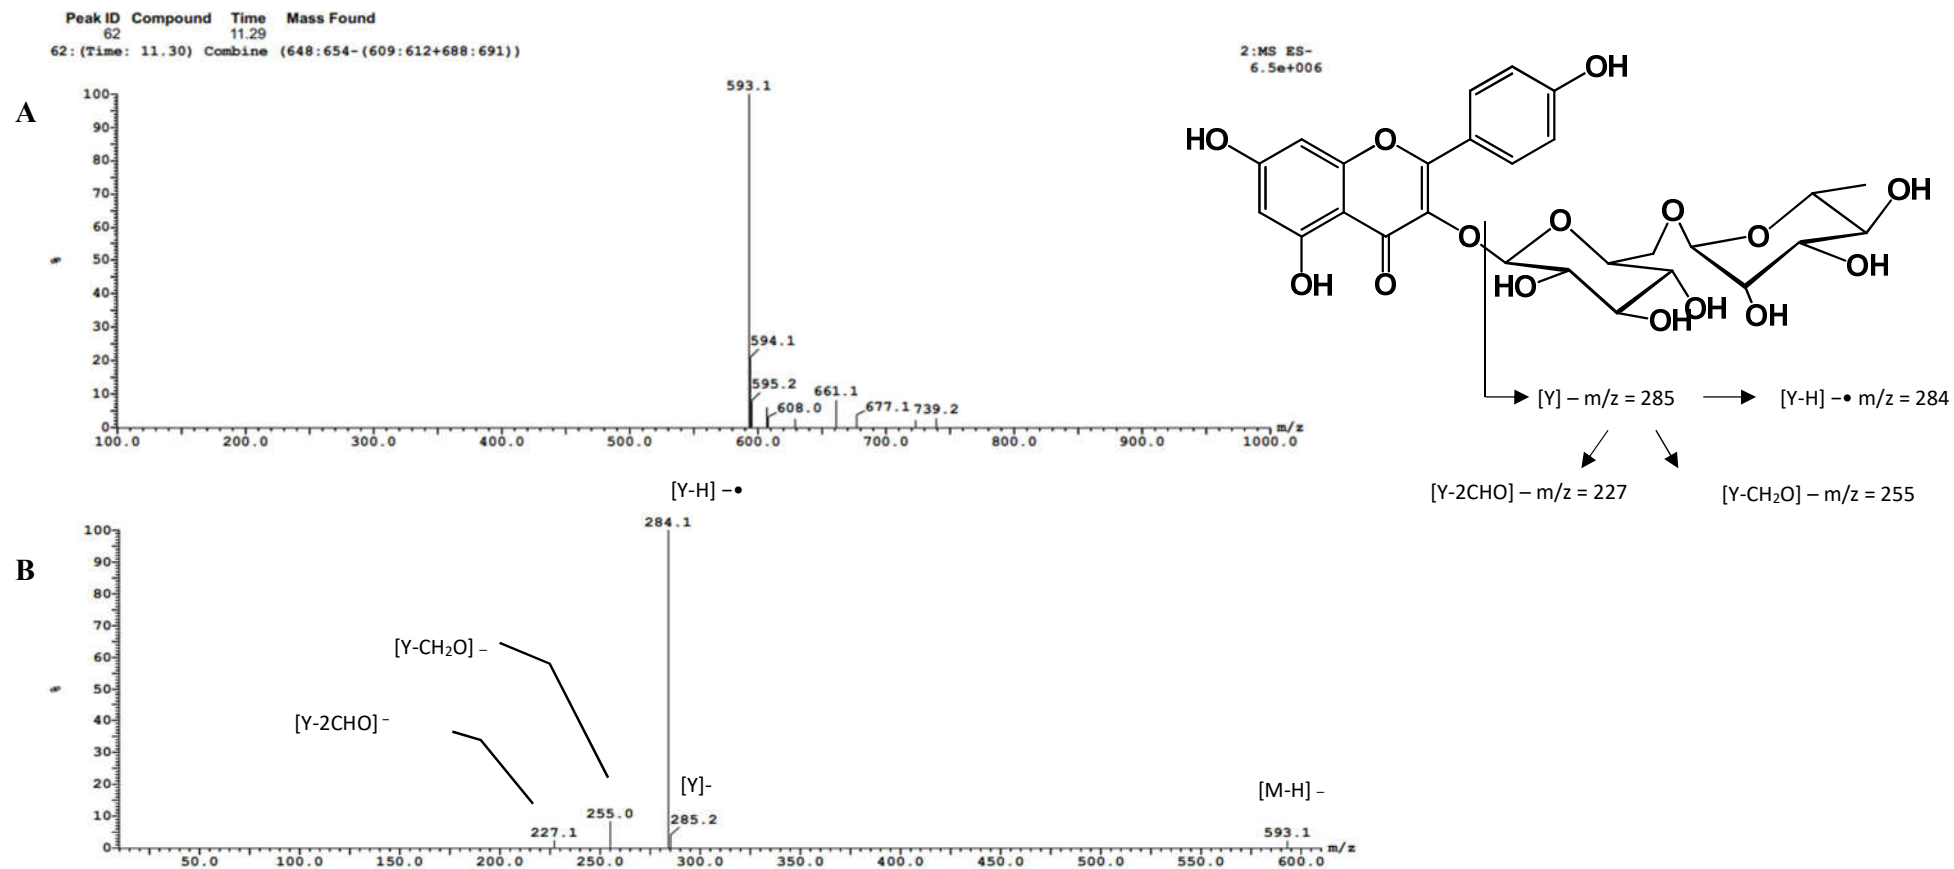

**Figure S3** Fragmentation pattern of peak (3) in total ion chromatogram of LC-ESI-MS, tentatively identified as Kaempferol-hexoside deoxyhexoside (kaempferol-3-O-rutinoside) before fragmentation (A), after fragmentation (B).

| Peak ID                                               | Compound | Time  | Mass Found |
|-------------------------------------------------------|----------|-------|------------|
| 63                                                    |          | 11.64 |            |
| 63: (Time: 11.63) Combine (667:673-(627:630+716:719)) |          |       |            |

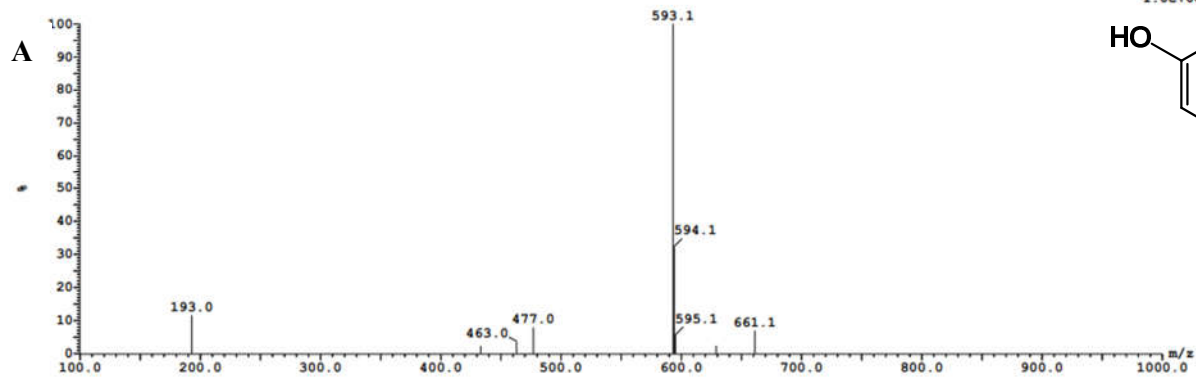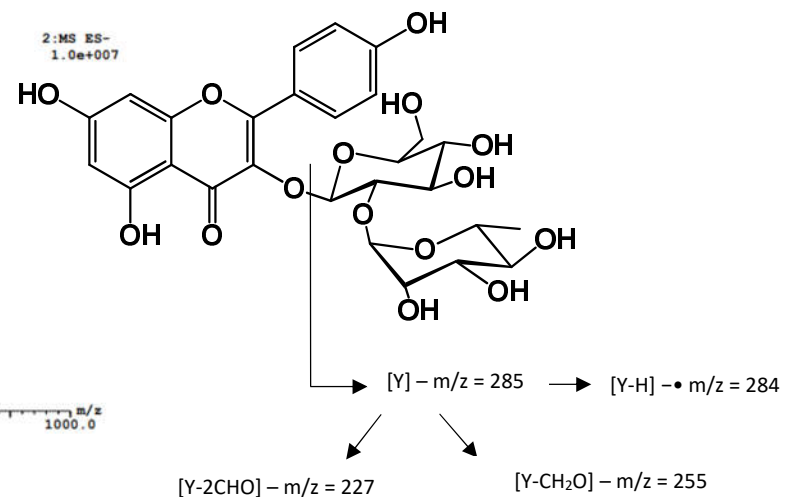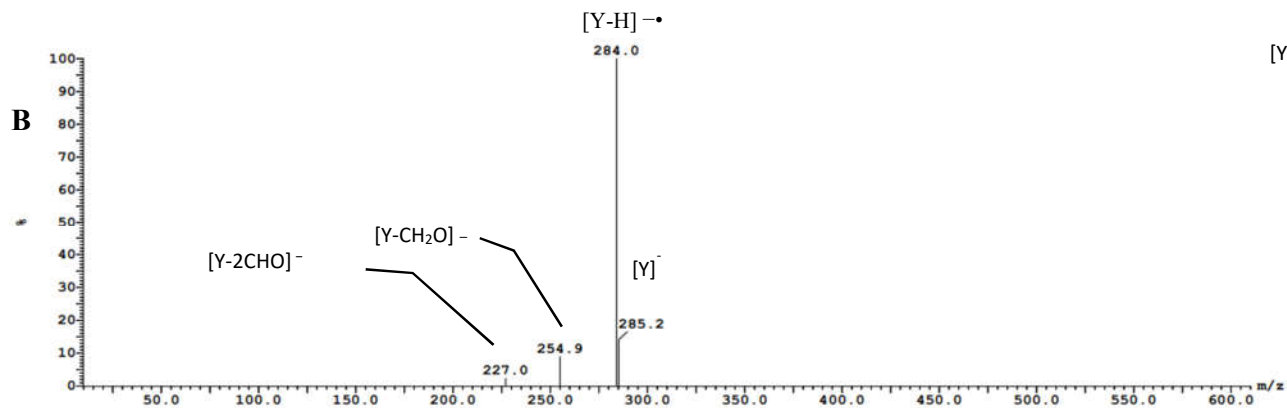

**Figure S4** Fragmentation pattern of peak (4) in total ion chromatogram of LC-ESI-MS spectrum, tentatively identified as Kaempferol-hexoside deoxyhexoside (kaempferol -3-O-neohesperidoside) before fragmentation (A), after fragmentation (B).

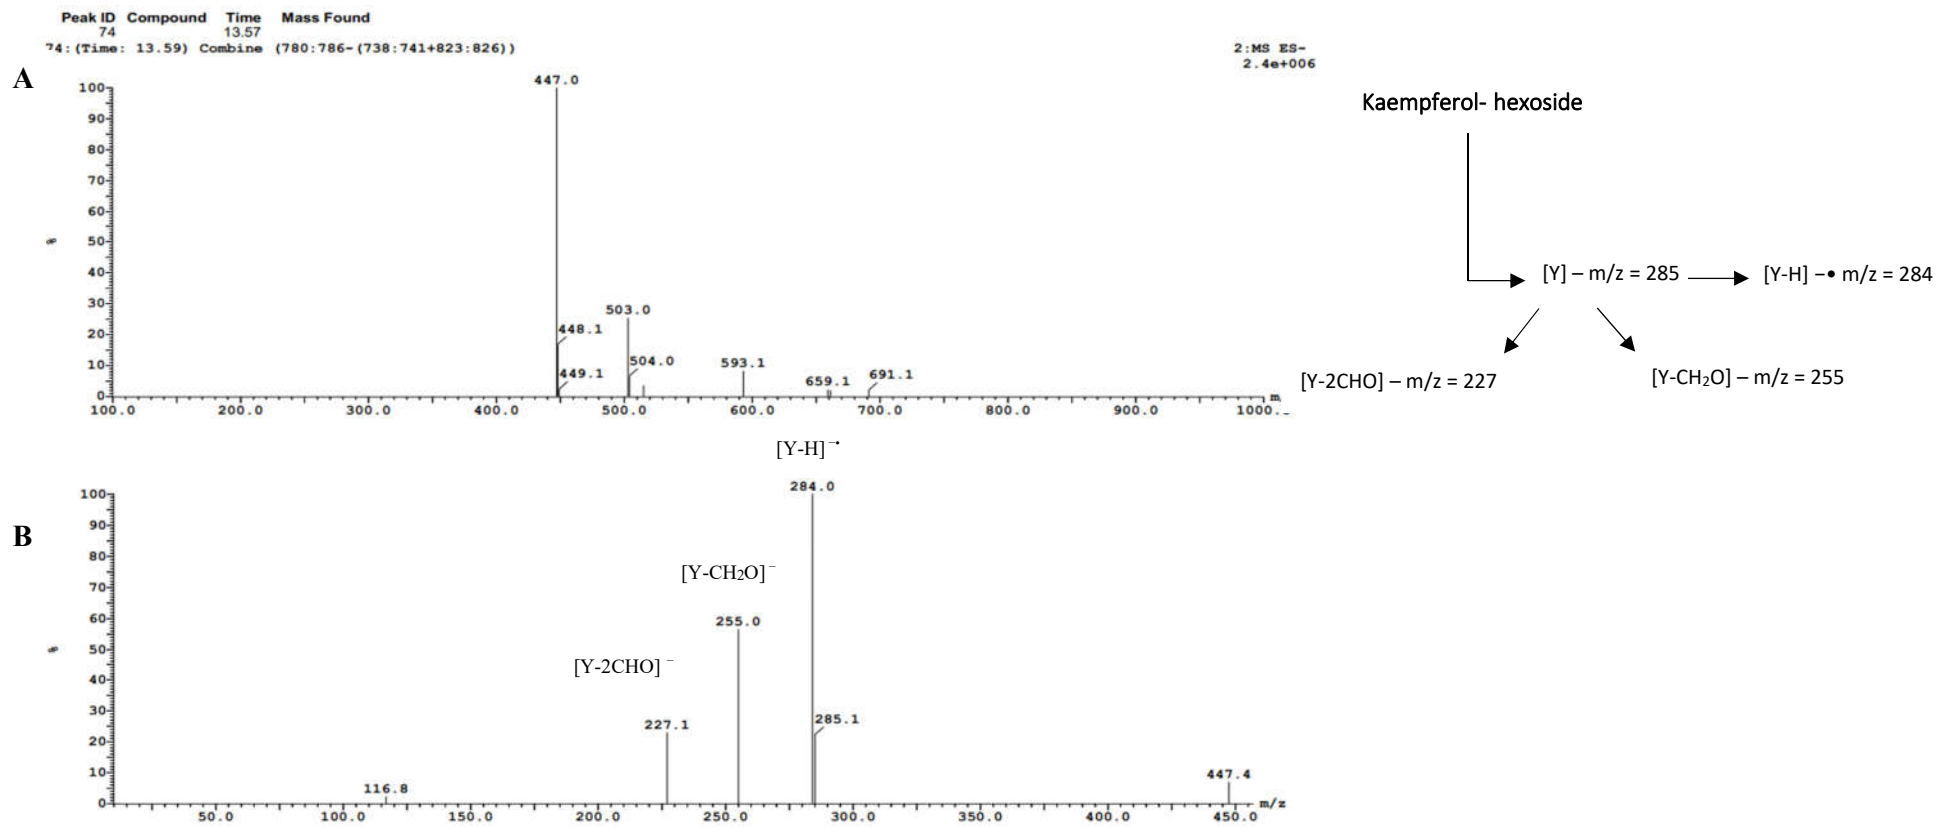

**Figure S5** Fragmentation pattern of peak (5) in total ion chromatogram of LC-ESI-MS, tentatively identified as kaempferol-hexoside before fragmentation (A), after fragmentation (B).

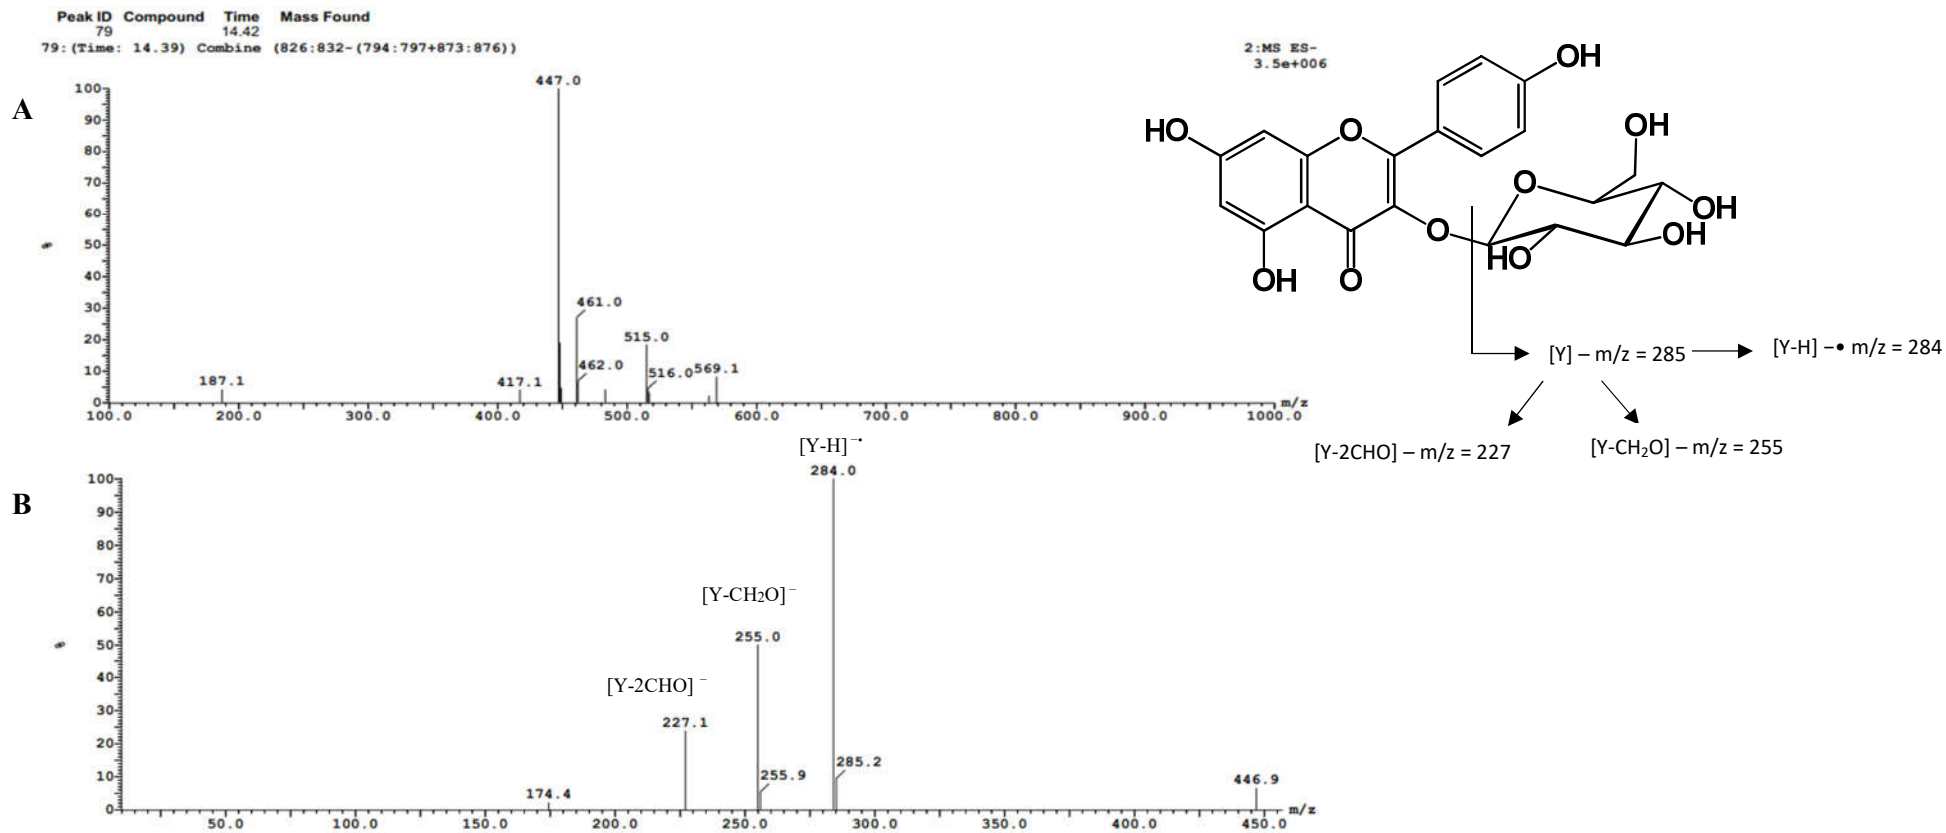

**Figure S6** Fragmentation pattern of peak (6) in total ion chromatogram of LC-ESI-MS, tentatively identified as kaempferol-3-O- $\beta$ -D-glucoside before fragmentation (A), after fragmentation (B).

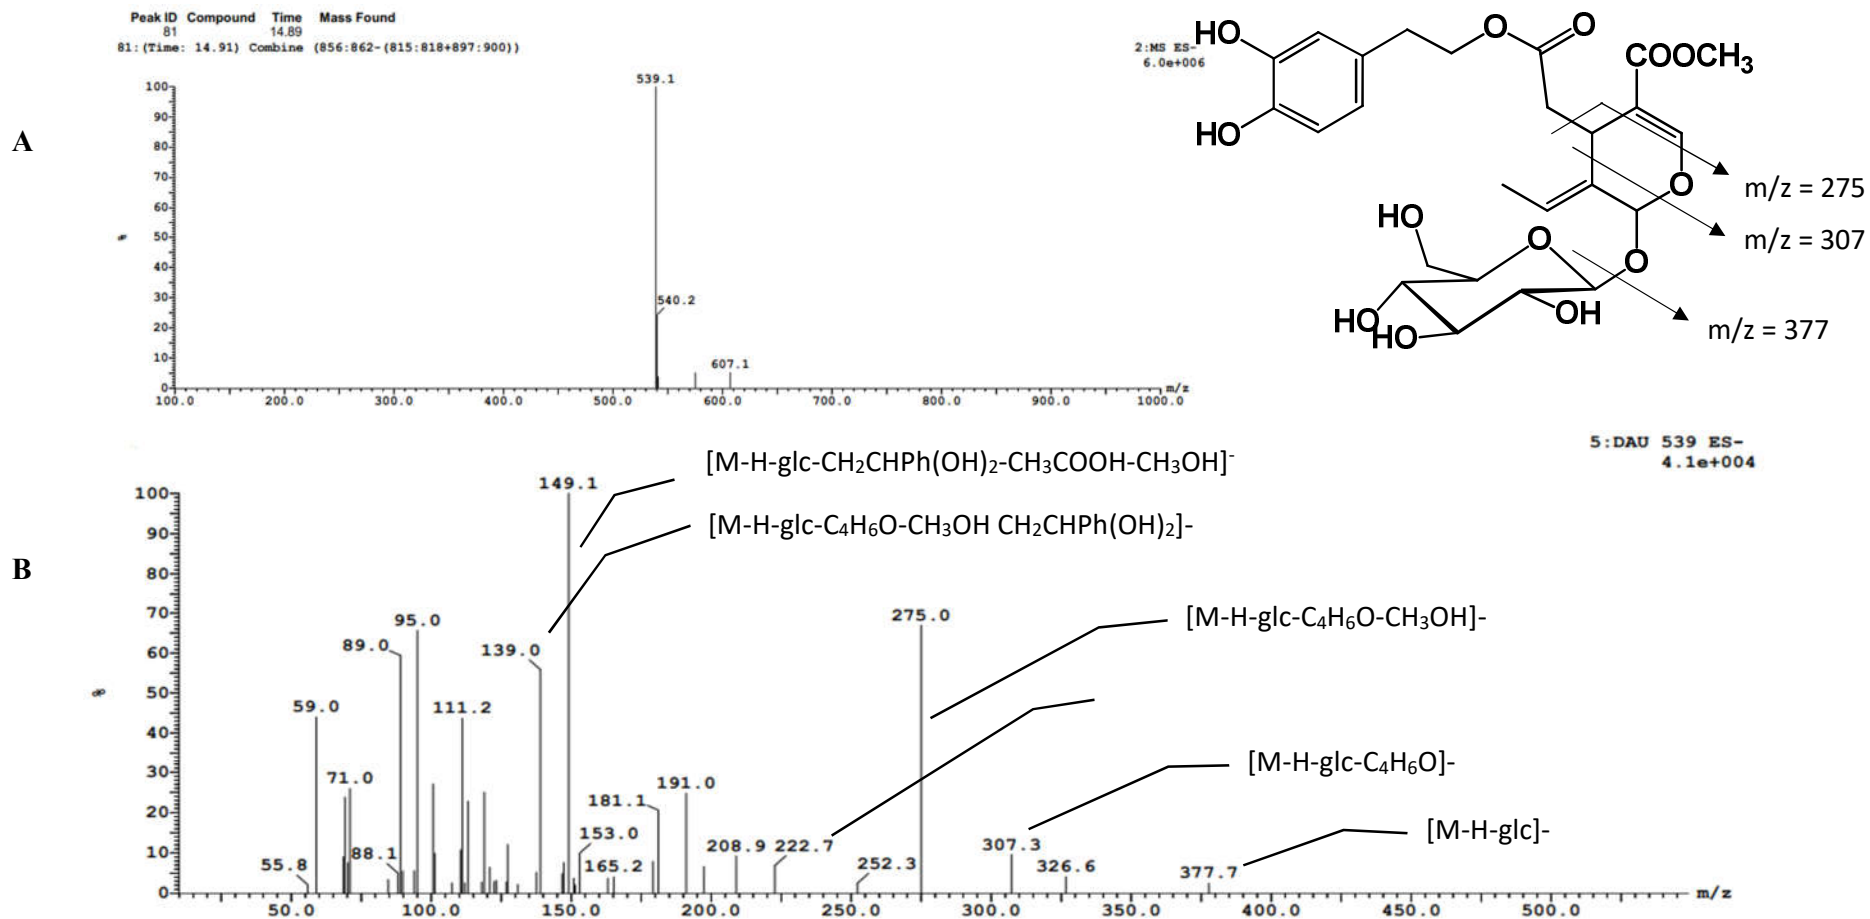

**Figure S7** Fragmentation pattern of peak (7) in LC-MS spectrum, tentatively identified as oleuropein before fragmentation (A), after fragmentation (B).



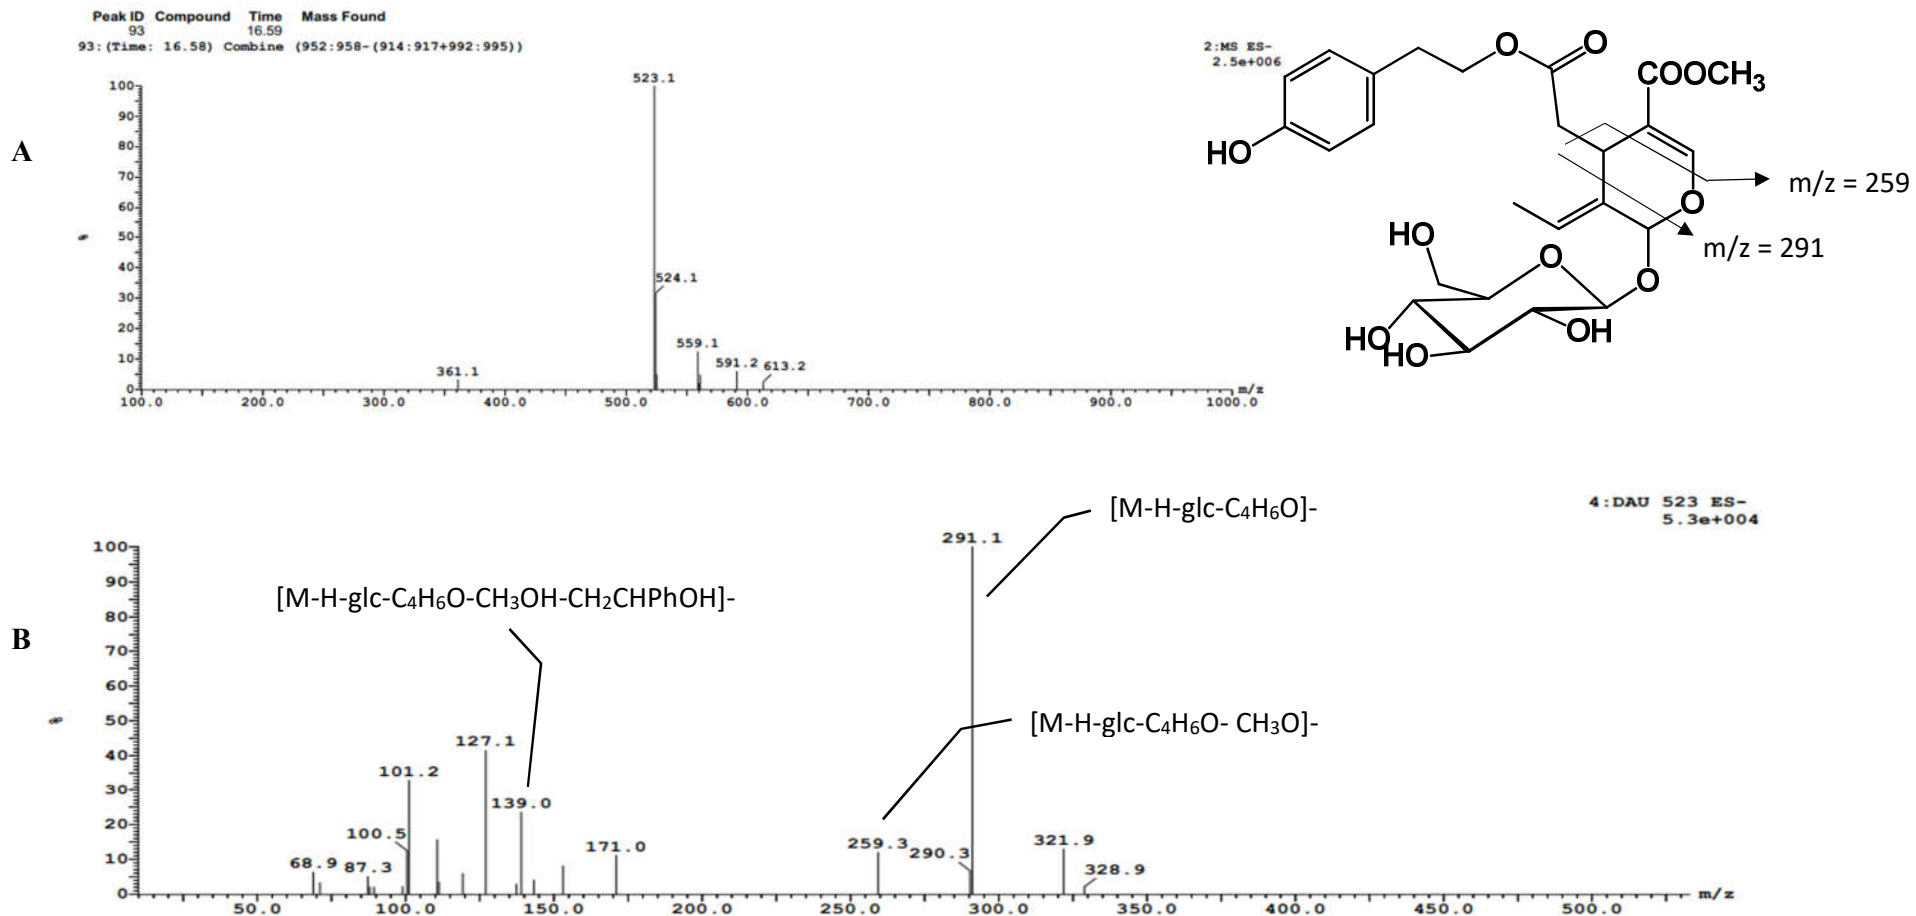

**Figure S8** Fragmentation pattern of peak (8) in LC-MS spectrum, tentatively identified as ligstroside before fragmentation (A), after fragmentation (B).
